# Supplementary material
Source: publisher figshare collection journal article supplement (https://springernature.figshare.com/ndownloader/files/22044732)
Supplement: Supplementary file [file 22044732]

**Additional file 4:** Example of the course programme for the initial five days and the two days follow-up of the multidisciplinary residential nutritional rehabilitation programme in the NUTRI-HAB Trial.

| INITIAL RESIDENTIAL STAY                                                                  |                                                            |                                                               |                                                                                                       |                                                                                        | FOLLOW-UP RESIDENTIAL STAY AFTER 3 MONTHS                                       |                                                                                                           |
|-------------------------------------------------------------------------------------------|------------------------------------------------------------|---------------------------------------------------------------|-------------------------------------------------------------------------------------------------------|----------------------------------------------------------------------------------------|---------------------------------------------------------------------------------|-----------------------------------------------------------------------------------------------------------|
| DAY 1                                                                                     | DAY 2                                                      | DAY 3                                                         | DAY 4                                                                                                 | DAY 5                                                                                  | DAY 1                                                                           | DAY 2                                                                                                     |
|                                                                                           | BREAKFAST BUFFET                                           | BREAKFAST BUFFET                                              | BREAKFAST BUFFET                                                                                      | BREAKFAST BUFFET                                                                       |                                                                                 | BREAKFAST BUFFET                                                                                          |
|                                                                                           | MORNING ASSEMBLY                                           | MORNING ASSEMBLY                                              | MORNING ASSEMBLY                                                                                      | MORNING ASSEMBLY                                                                       |                                                                                 | MORNING ASSEMBLY                                                                                          |
| Arrival                                                                                   |                                                            |                                                               | Physical activity (physiotherapist)                                                                   | Motivation, goal setting and action plans (social worker and course leader)            | Arrival                                                                         | Physical activity (physiotherapist)                                                                       |
| Welcome session with presentation of the programme (course leader and clinical dietitian) | Practical kitchen workshop (clinical dietitian)            | Psychological reactions to cancer (psychologist)              | Optional session: Fatigue and sleep problems (nurse) <i>OR</i> Vocational counselling (social worker) | Individual work and group discussion on action plans (social worker and course leader) | Welcome and presentation of the program (course leader and clinical dietitian)  | Optional session: Sexuality and intimacy (sexologist) <i>OR</i> Meaning and values in life (psychologist) |
| Walk and talk                                                                             |                                                            |                                                               |                                                                                                       |                                                                                        | What's new within the last three months? (course leader and clinical dietitian) |                                                                                                           |
| LUNCH BUFFET                                                                              | LUNCH BUFFET                                               | LUNCH BUFFET                                                  | LUNCH BUFFET                                                                                          | LUNCH BUFFET                                                                           | LUNCH BUFFET                                                                    | LUNCH BUFFET                                                                                              |
| Introduction round (course leader and central health professionals)                       | <u>DATA COLLECTION</u><br>Physical tests (physiotherapist) | Swallowing exercises (occupational therapist)                 | Dental problems and oral hygiene (dental hygienist)                                                   | Closing session and farewell (course leader and clinical dietitian)                    | <u>DATA COLLECTION</u><br>Physical tests (physiotherapist)                      | Closing session and farewell (course leader and clinical dietitian)                                       |
| Theoretical session on eating problems (clinical dietitian)                               |                                                            | Individual dietary counselling (clinical dietitian)           | Individual counselling (depending on the participant's needs)                                         |                                                                                        | Individual dietary counselling (clinical dietitian)                             |                                                                                                           |
|                                                                                           | Yoga (physiotherapist)                                     |                                                               | Massage therapy (massage therapist)                                                                   |                                                                                        |                                                                                 |                                                                                                           |
| DINNER                                                                                    | DINNER                                                     | DINNER                                                        | DINNER                                                                                                |                                                                                        | DINNER                                                                          |                                                                                                           |
| Social activity                                                                           | Group conversation on existence (priest)                   | (Possibility to go for a walk, watch movies, play games etc.) |                                                                                                       |                                                                                        |                                                                                 |                                                                                                           |
